# Supplementary figures and images for: Differential chondro- and osteo-stimulation in three-dimensional porous scaffolds with different topological surfaces provides a design strategy for biphasic osteochondral engineering
Source: PubMed Central journal article supplement — J Tissue Eng. 2019 Jan 31;10:2041731419826433. doi: 10.1177/2041731419826433 (PMC6357292; doi:10.1177/2041731419826433), 2019-01-31

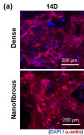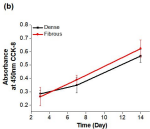

Supplement: supporting.pdf [file supporting.pdf]
